# Supplementary material
Source: PubMed Central journal article supplement (PMC1200261)

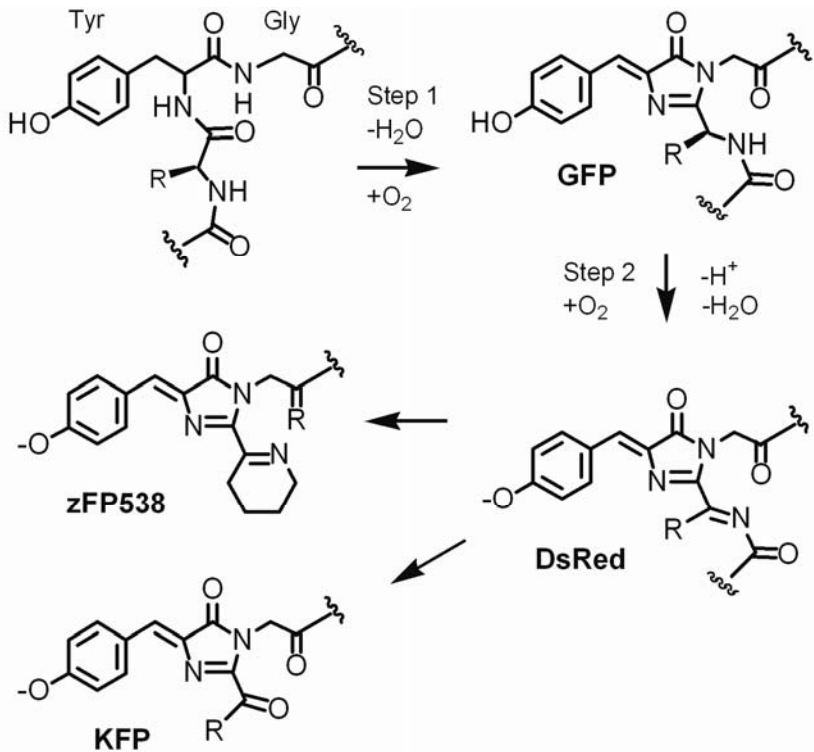

Supplement: pnas_0502250102_1.pdf [file pnas_0502250102_1.pdf]

# H199 Mutant Absorbance Spectra

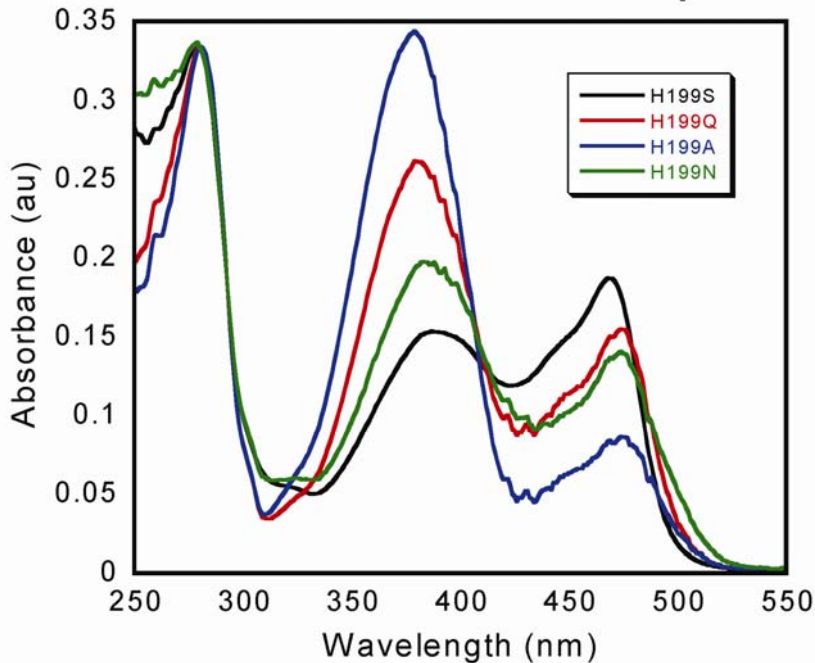

Supplement: pnas_0502250102_2.pdf [file pnas_0502250102_2.pdf]
